# Supplementary material
Source: PubMed Central journal article supplement (PMC3260829)
Supplement: mmc1.pdf [file mmc1.pdf]

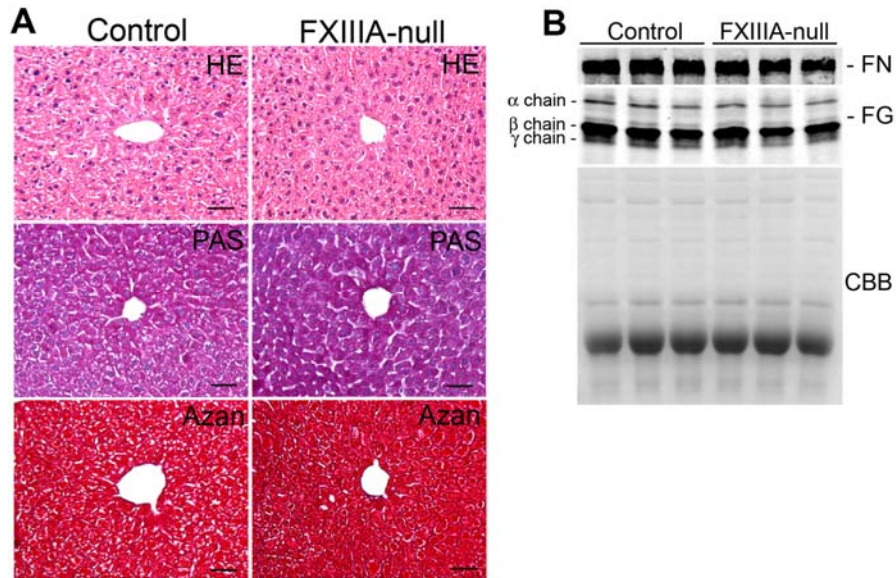

**Supplementary Figure S1.** Characterization of FXIII A-null mice. **(A)** Histological analysis of the intact livers from 8-week old adult control and Factor XIII A-null mice with hematoxylin/eosin (HE, upper panels), periodic acid-schiff (PAS, middle panels) and mallory-azan (Azan, lower panels) staining. Scar = 50  $\mu$ m. **(B)** Western blot analysis of plasma fibronectin (FN) and fibrinogen (FG) levels in intact control and FXIII A-null mice. The same samples were stained with Coomassie brilliant blue (CBB) to confirm that comparable amounts of protein were loaded.
