# Supplementary material
Source: PubMed Central journal article supplement (PMC3260829)
Supplement: mmc2.pdf [file mmc2.pdf]

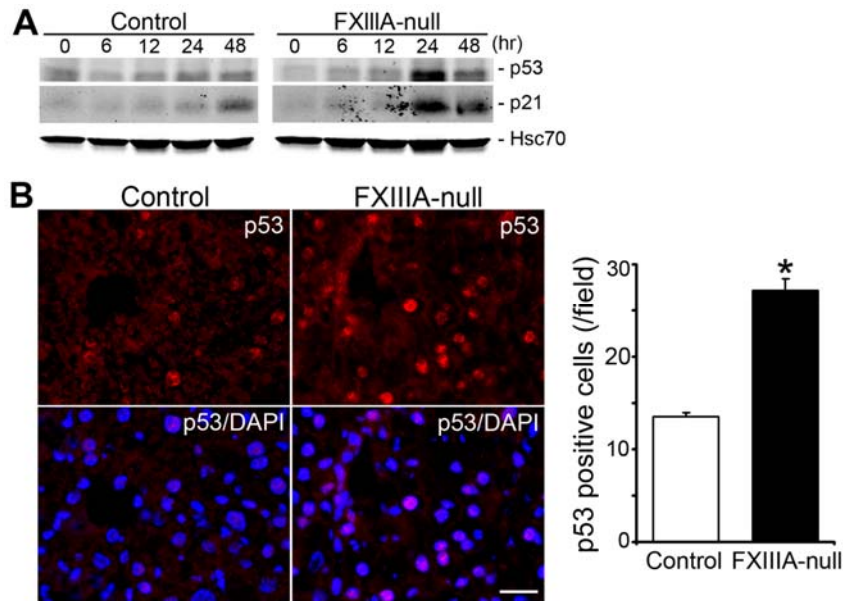

**Supplementary Figure S2.** The FXIII-null liver shows increased expression levels of p53 and p21 following acute liver injury. **(A)** Western blot analysis of p53, p21 and Hsc70 (loading control) in response to acute liver injury. Pooled samples from 3 mouse livers in control and mutant mice were used for the analysis. **(B)** Left panels: Pronounced induction of p53 in FXIII A-null hepatocyte nuclei at 24 hrs after injury by immunofluorescent staining (p53 in red; DAPI [cell nuclei] in blue). Scale bar = 25  $\mu$ m. Right panel: Analysis of p53 positive hepatocytes (Hepatocyte nuclei are ~2- to 3-fold larger than those of non-parenchymal cells as shown in Fig. 5B). Data are the means  $\pm$  S.D (cells/field; field = 0.036 mm<sup>2</sup> [ $n = 5$  for each group]). \*,  $P < 0.05$ .
